# Supplementary material
Source: MDPI journal article supplement (https://www.mdpi.com/2072-4292/15/2/318)
Supplement: s1 [file s1]

## Supplementary Material

**Table S1.** Selection of stationary and non-stationary variables based on DIFF values.

| Variables | Estimate  | Min      | Max      | Diff of Criterion |
|-----------|-----------|----------|----------|-------------------|
| Intercept | 903.4717  | -6372.29 | 7640.961 |                   |
| DEM       | -0.11224  | -3.34609 | 9.669012 |                   |
| Cloud     | 202.5349  | -12624.6 | 14642.88 |                   |
| ET        | -0.19877  | -1.73908 | 5.565363 |                   |
| NDVI      | 951.2153  | -2317.23 | 2100.574 |                   |
| Wind      | 22.88844  | -2757.97 | 2712.794 |                   |
| Slope     | -4.661409 | -15.6504 | 8.355109 |                   |
| LST       | -8.567101 | -64.0413 | 33.74321 |                   |

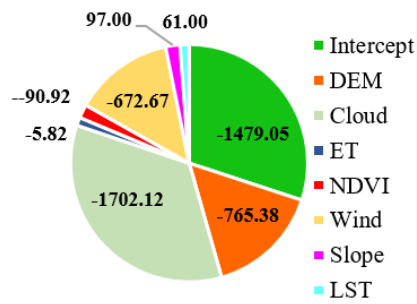

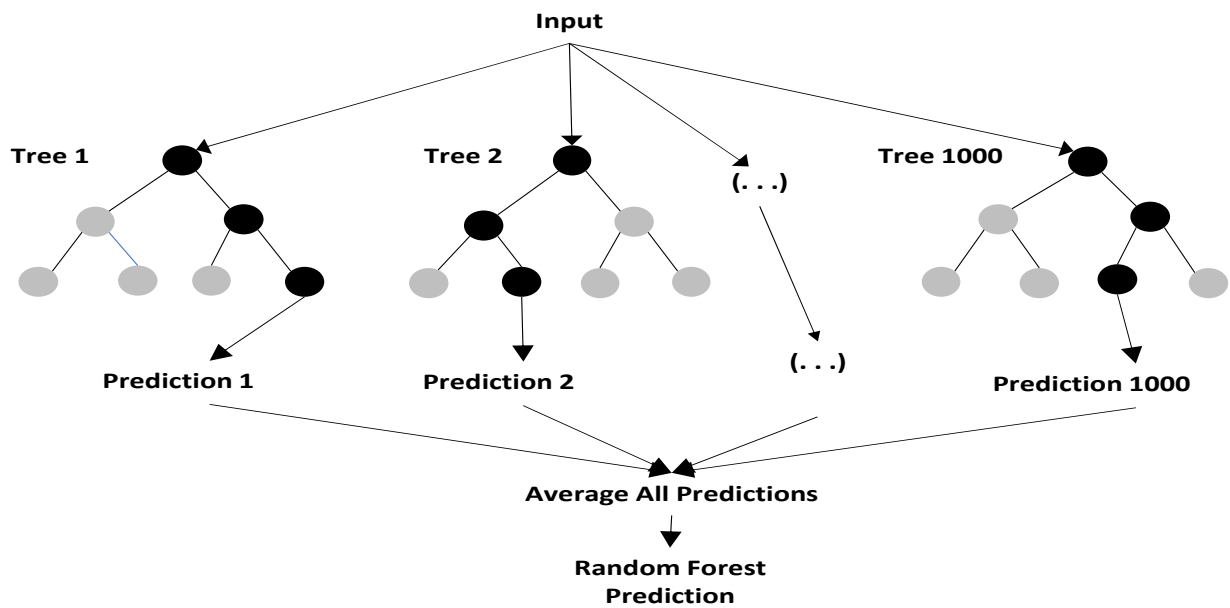

**Figure S1.** An overview of RF model computation.

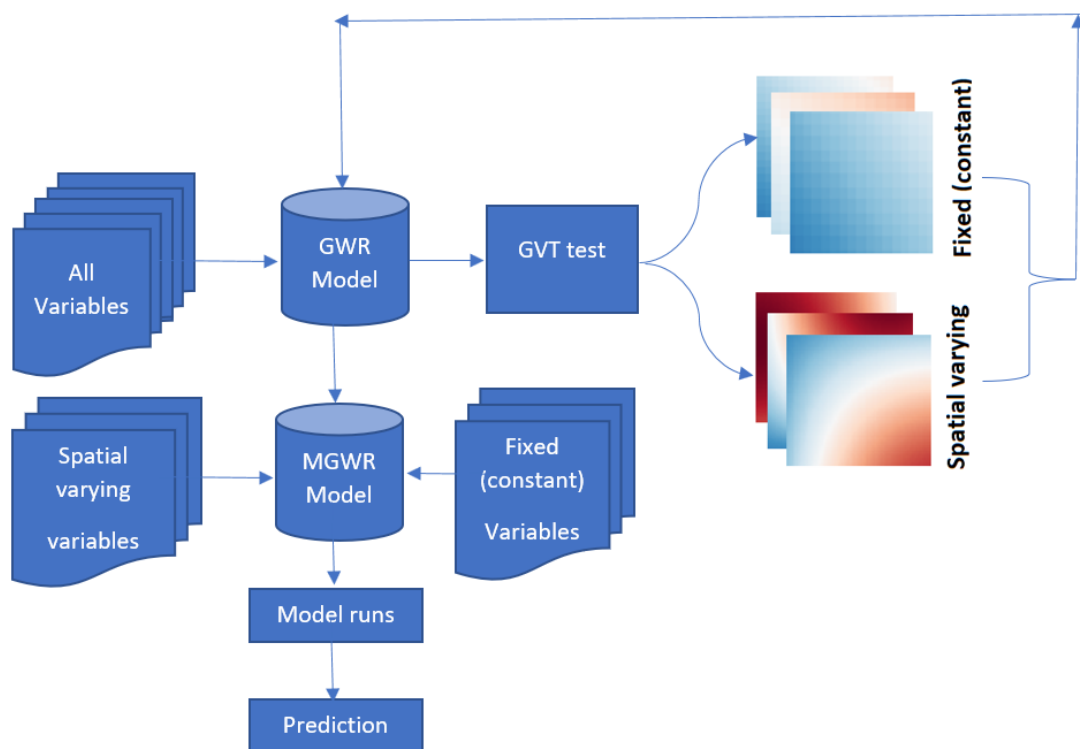

**Figure S2.** Building MGWR model based on GVT test.

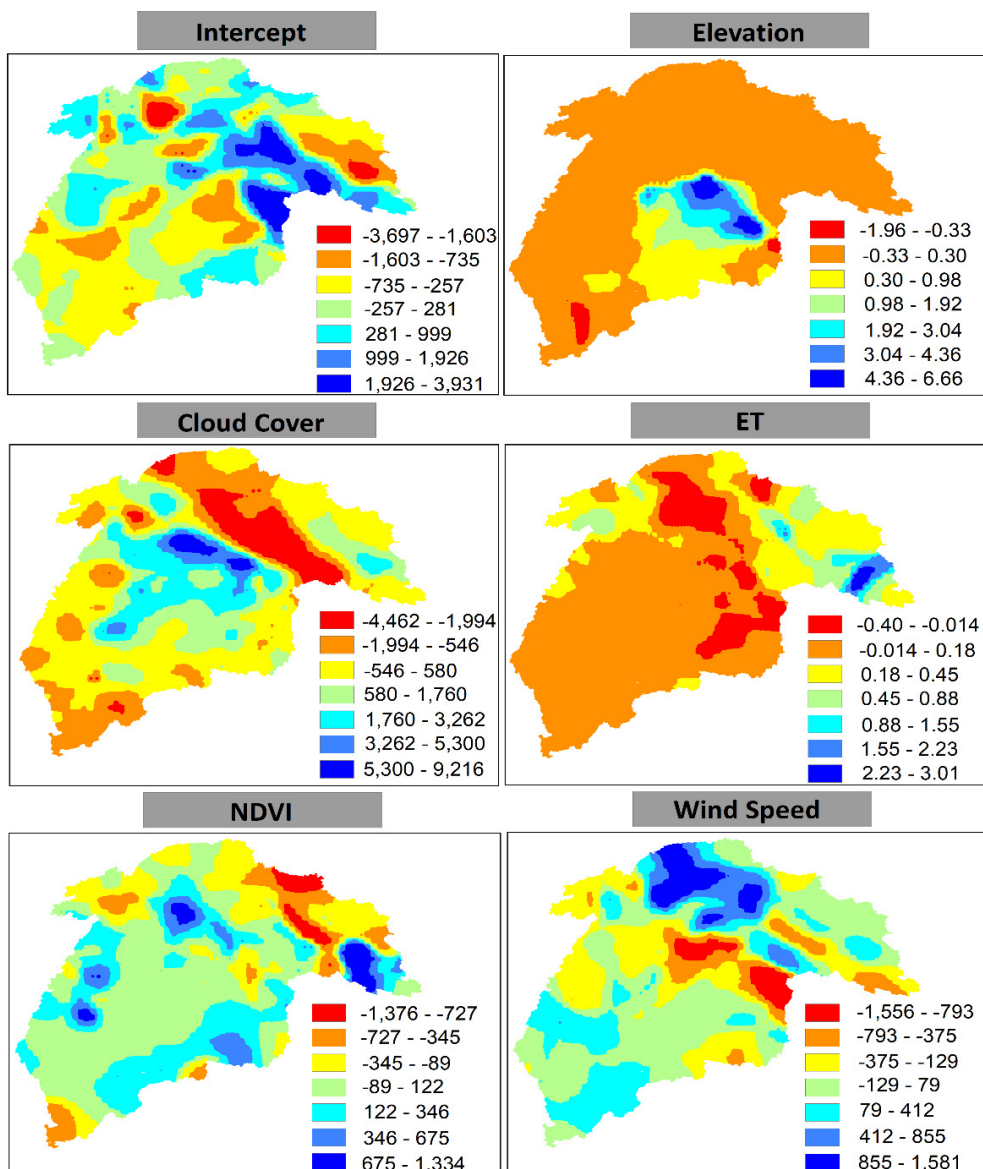

**Figure S3.** Regression coefficients interpolated at 1km resolution.

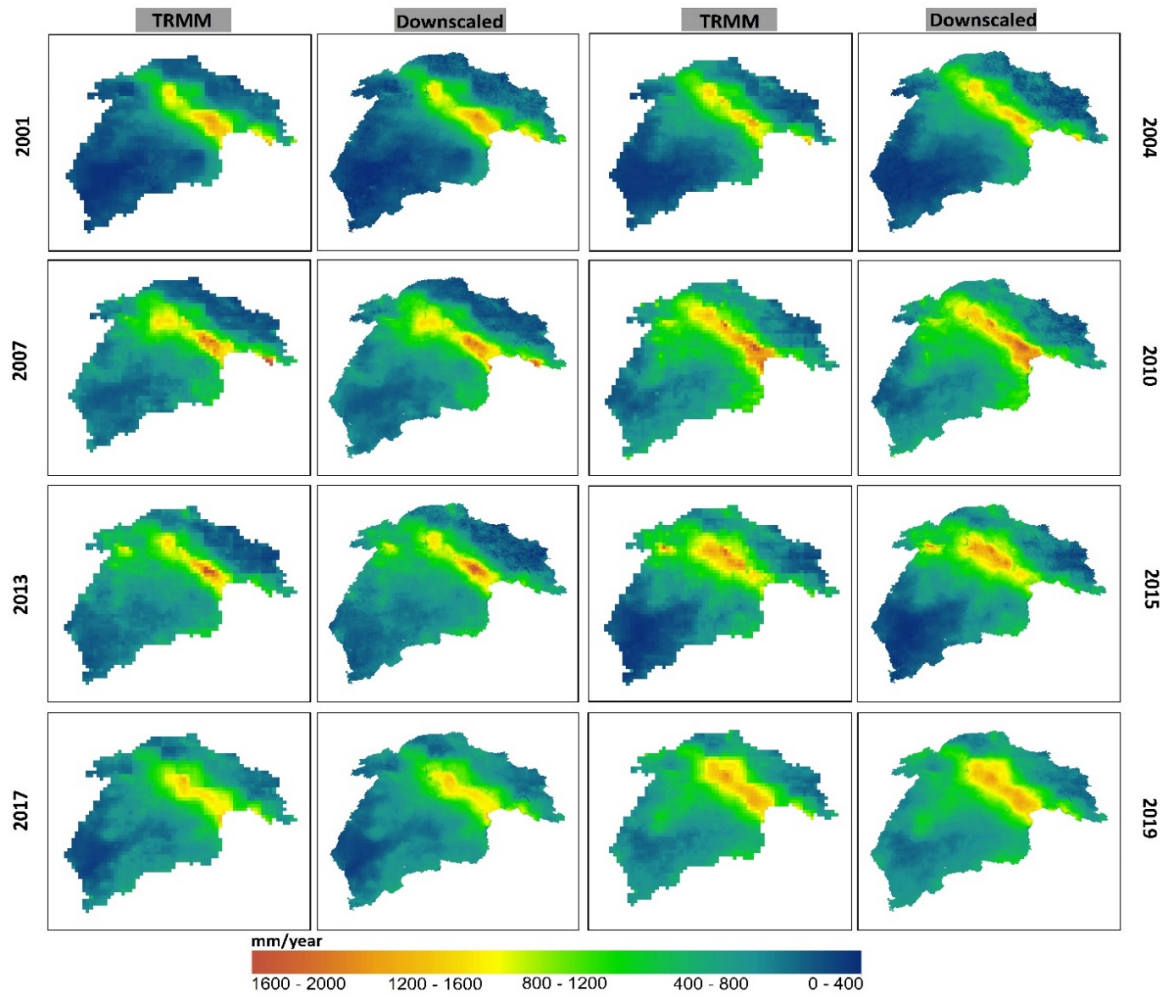

**Figure S4.** Comparison between the spatial pattern of annual precipitation estimates obtained from the original TRMM (~25 km) and downscaled TRMM (1km) for different years from 2000-2019.

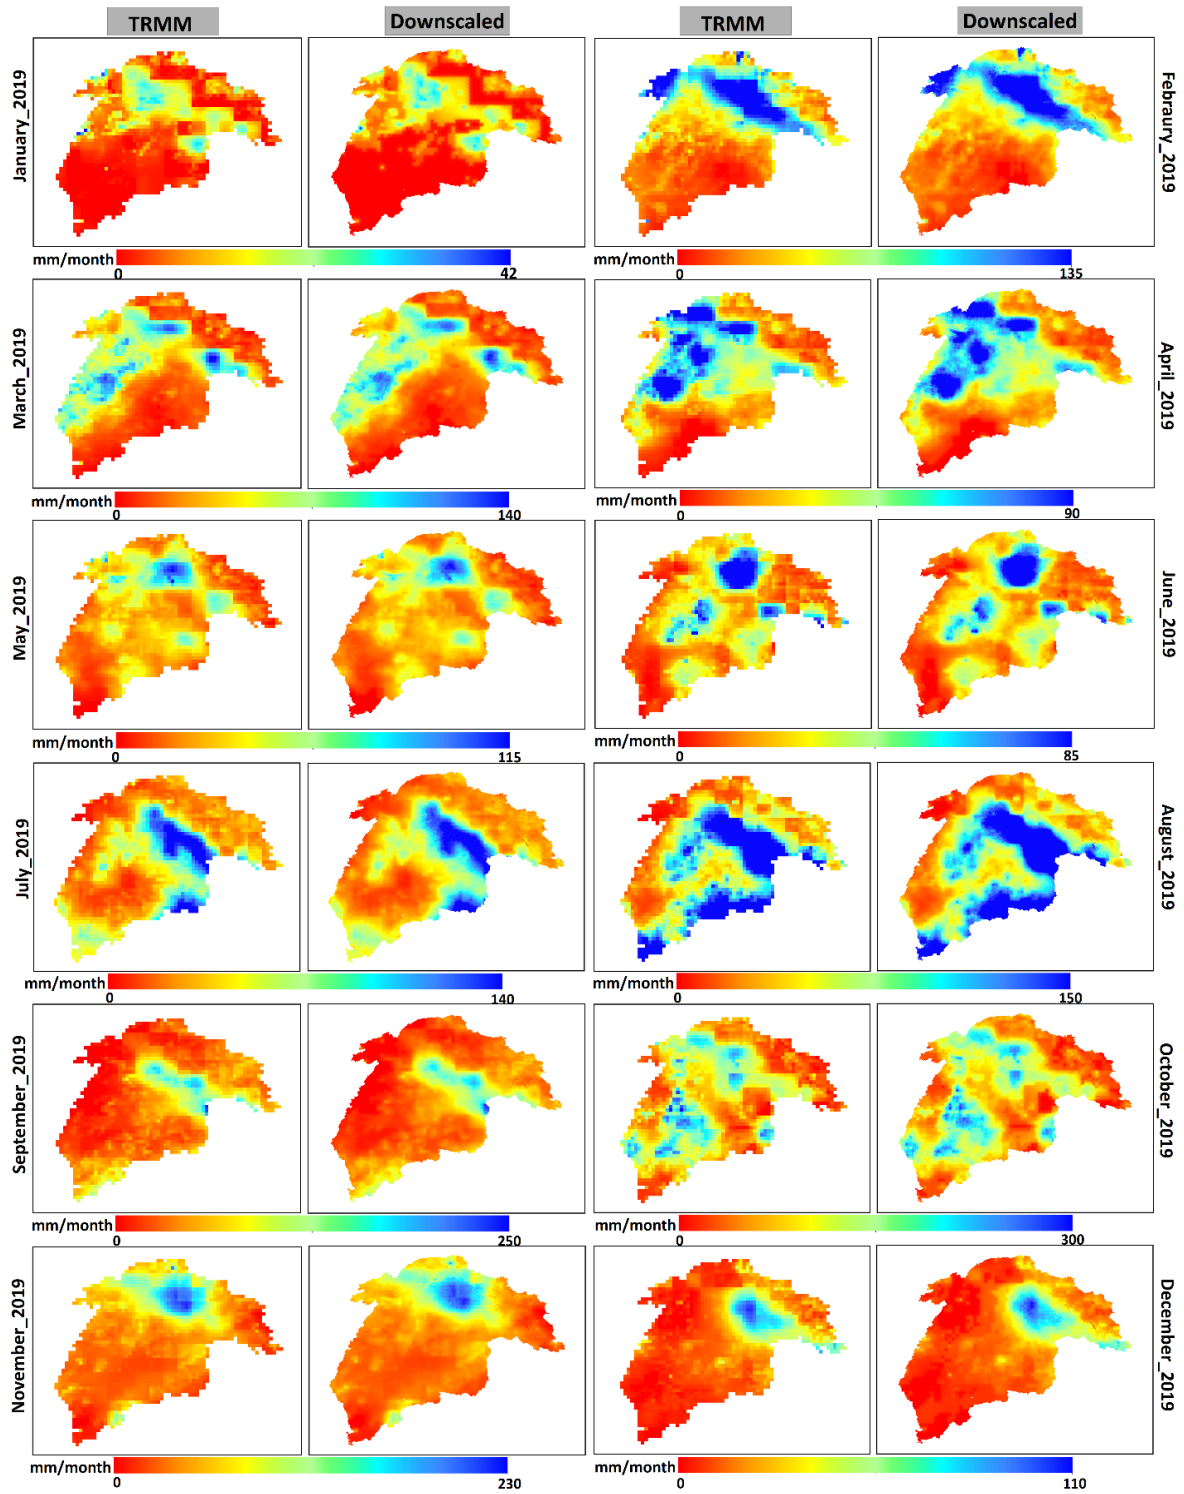

**Figure S5.** Comparison between the spatial pattern of monthly precipitation estimates obtained after disaggregation of the annual TRRM (~25 km) and downscaled TRMM (1km) for different months of 2019.
